# Supplementary material
Source: Royal Society of Chemistry journal article supplement (doi:10.1039/d6ta00316h)
Supplement: d6ta00316h1.pdf [file d6ta00316h1.pdf]

**Supporting Information for:**

**Concentration dependent salt-polymer-dynamic bond interactions dictate non-monotonic conductivity and viscoelasticity in vitrimer electrolytes**

*Samyak N. Chordia<sup>1,2</sup>, Paul V. Braun<sup>1,2</sup>, Shailesh N. Joshi<sup>2,3</sup>, Timothy S. Arthur<sup>4</sup>, Yu-Hsuan Tsao<sup>1,2</sup>, Christopher M. Evans<sup>1,2\*</sup>*

<sup>1</sup>Department of Materials Science and Engineering and <sup>2</sup>Materials Research Laboratory, University of Illinois Urbana Champaign, Urbana, Illinois 61801, United States

<sup>3</sup>Electronics Research Department and <sup>4</sup>Materials Research Department, Toyota Research Institute of North America, Ann Arbor, Michigan 48105, USA

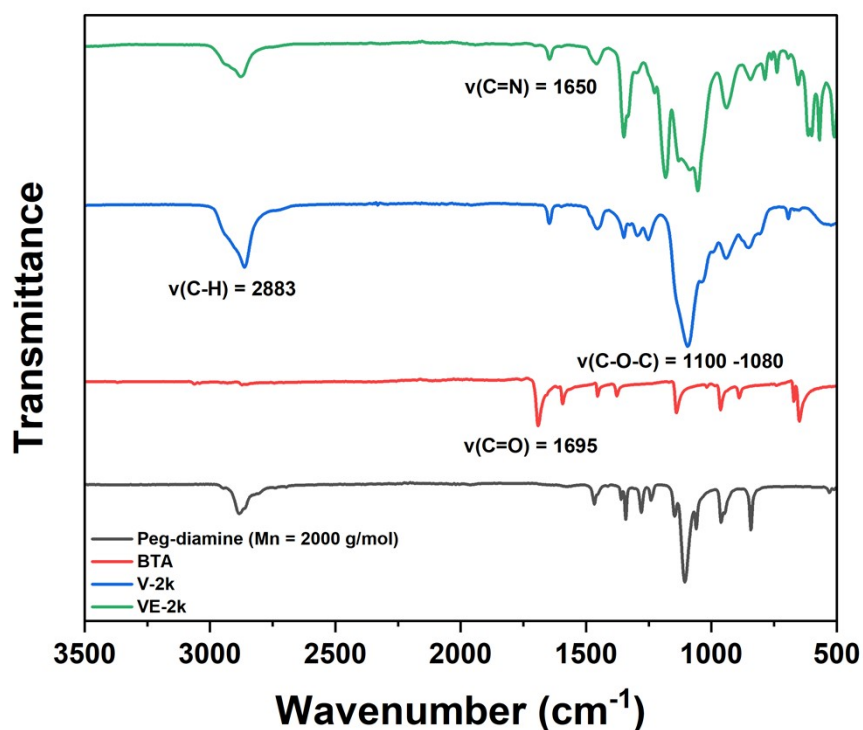

**Figure S1.** FTIR spectra of imine vitrimers shows presence of 1650 cm<sup>-1</sup> peak, corresponding to imine bond stretch and disappearance of the aldehyde peak at 1695 cm<sup>-1</sup> in neutral (V-2k) and salt-doped (VE-2k) networks indicating high conversion.

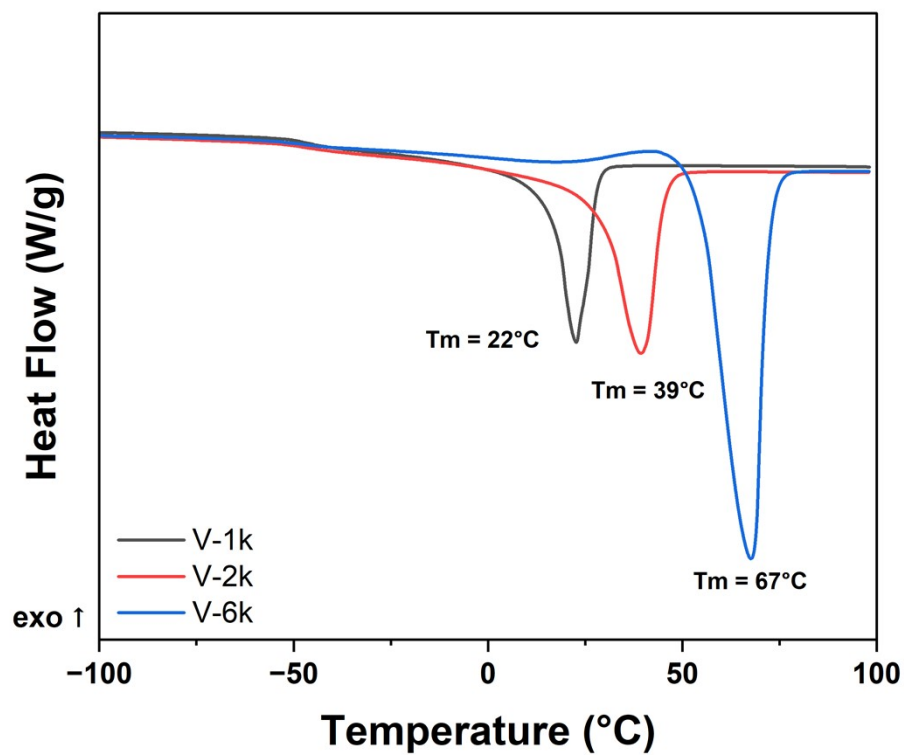

**Figure S2.** DSC curves for imine networks show a melting peak  $T_m$ , which increases with decreasing crosslinking density (longer EO chains).  $T_g$  values are observed at -50 °C for all the samples.

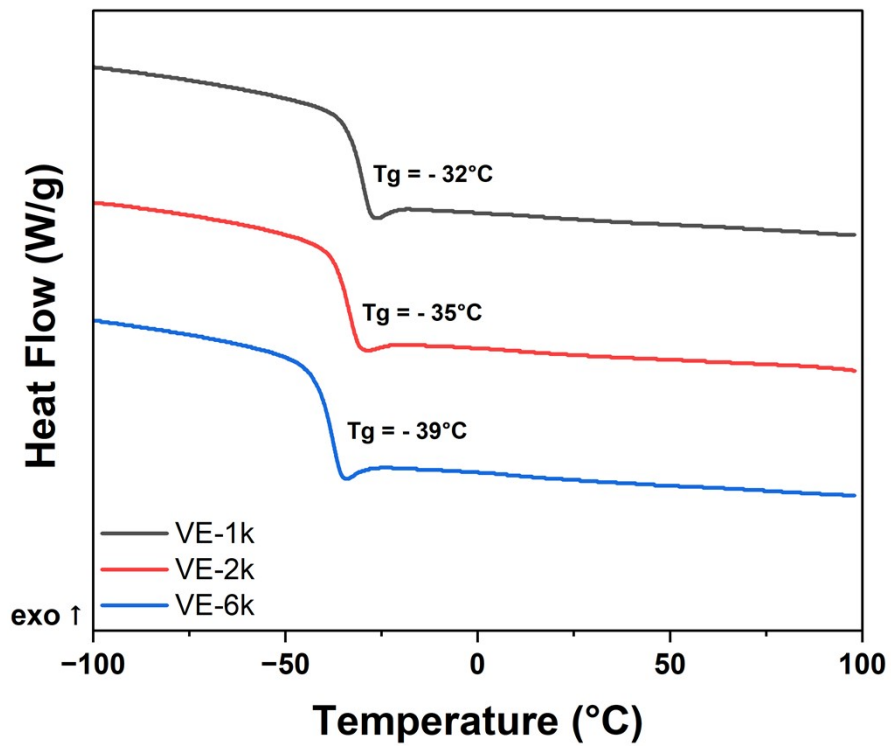

**Figure S3.** On salt addition, no  $T_m$  is observed and  $T_g$  increases relative to neutral vitrimers.  $T_g$  values increase with increasing crosslinking density.

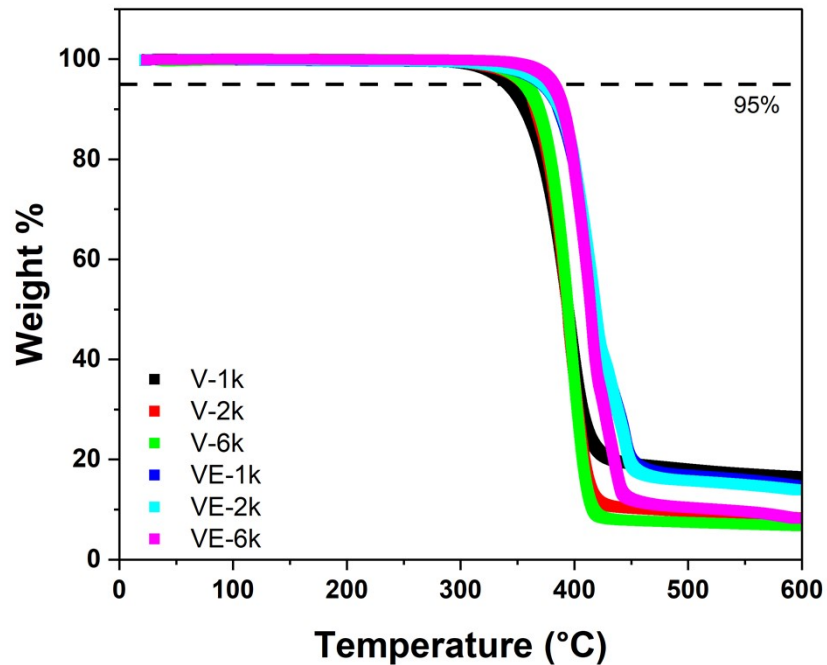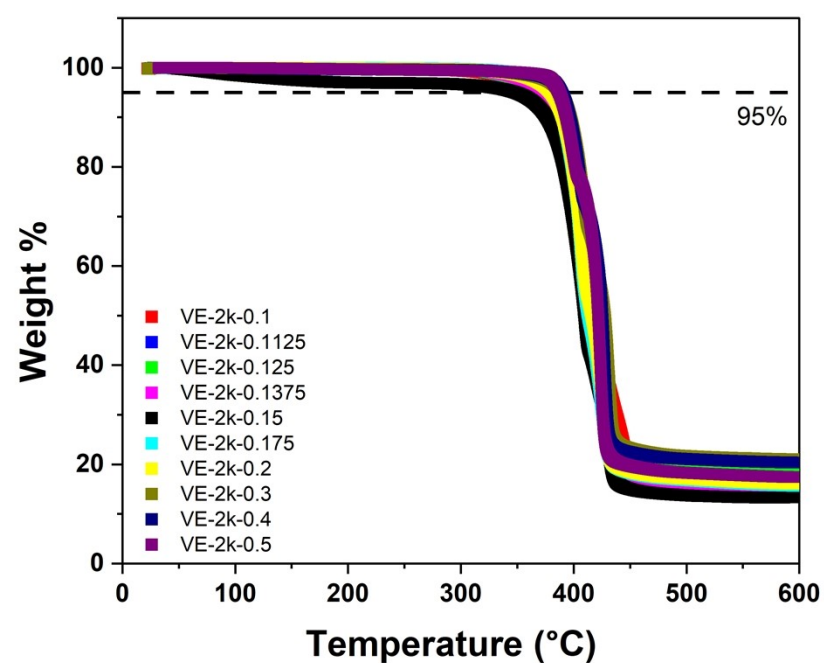

**Figure S4.** Thermal stability of vitrimer networks and electrolytes determined using thermogravimetric analysis. VEs show a higher onset of degradation ( $T_d$ ) relative to V networks (**Table 1 and Table 2**)

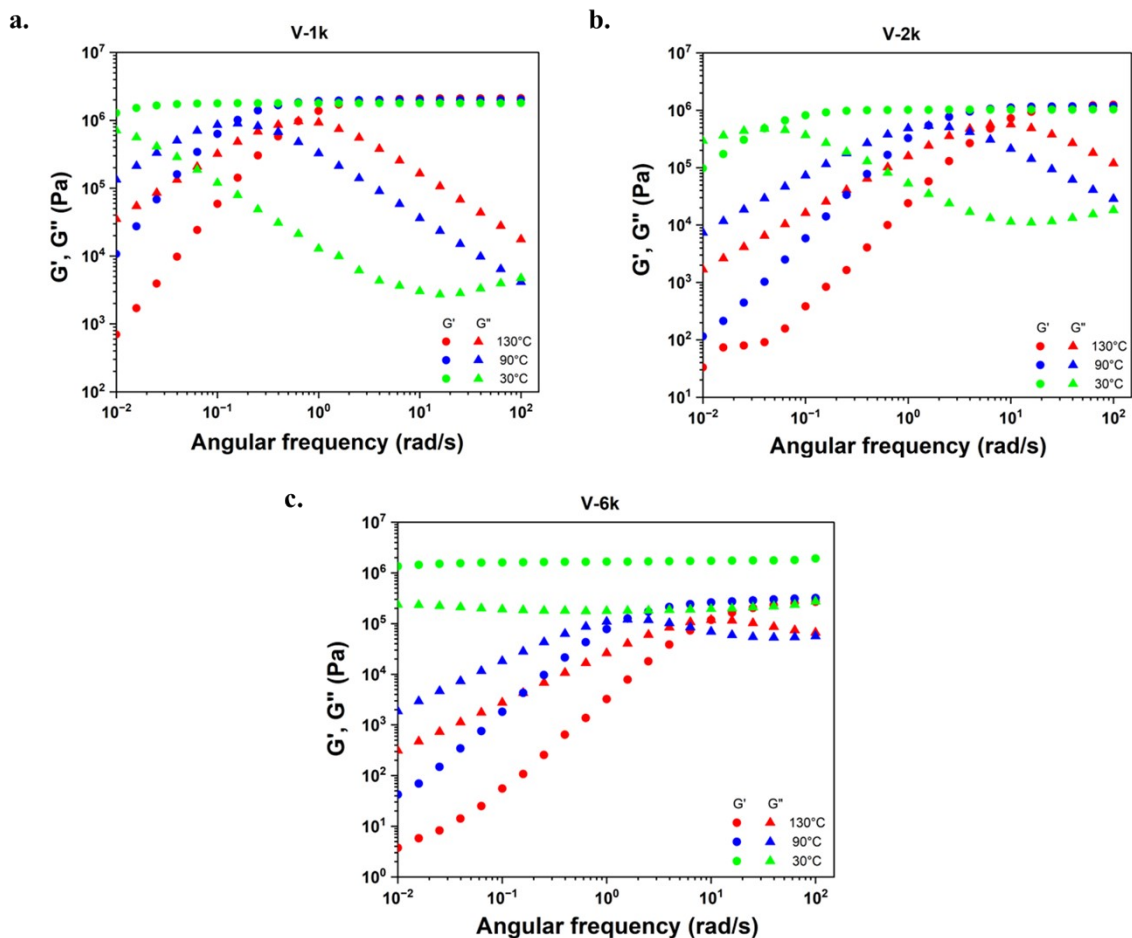

**Figure S5.** Frequency sweeps showing the storage modulus ( $G'$ , solid circle symbols) and loss modulus ( $G''$ , solid triangle symbols) as a function of angular frequency from 130 °C to 30 °C for neutral vitrimers with varying crosslinking density (V-x). The plateau modulus increases with temperature as in permanent networks, except for V-6k sample which crystallizes below 50 °C.

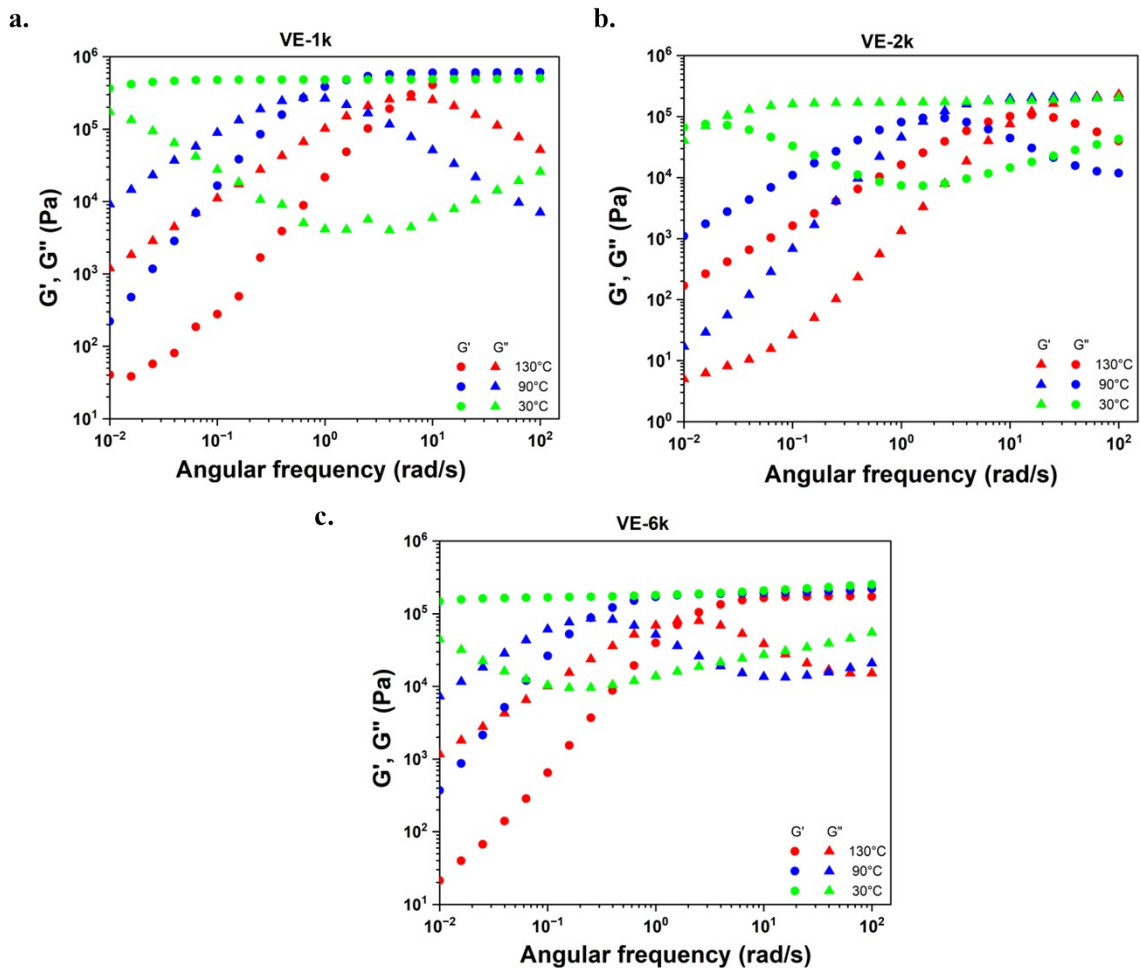

**Figure S6** Frequency sweeps showing the storage modulus ( $G'$ , solid circle symbols) and loss modulus ( $G''$ , solid triangle symbols) as a function of angular frequency from 130 °C to 30 °C for vitrimer electrolytes with varying crosslinking density (VE-x).

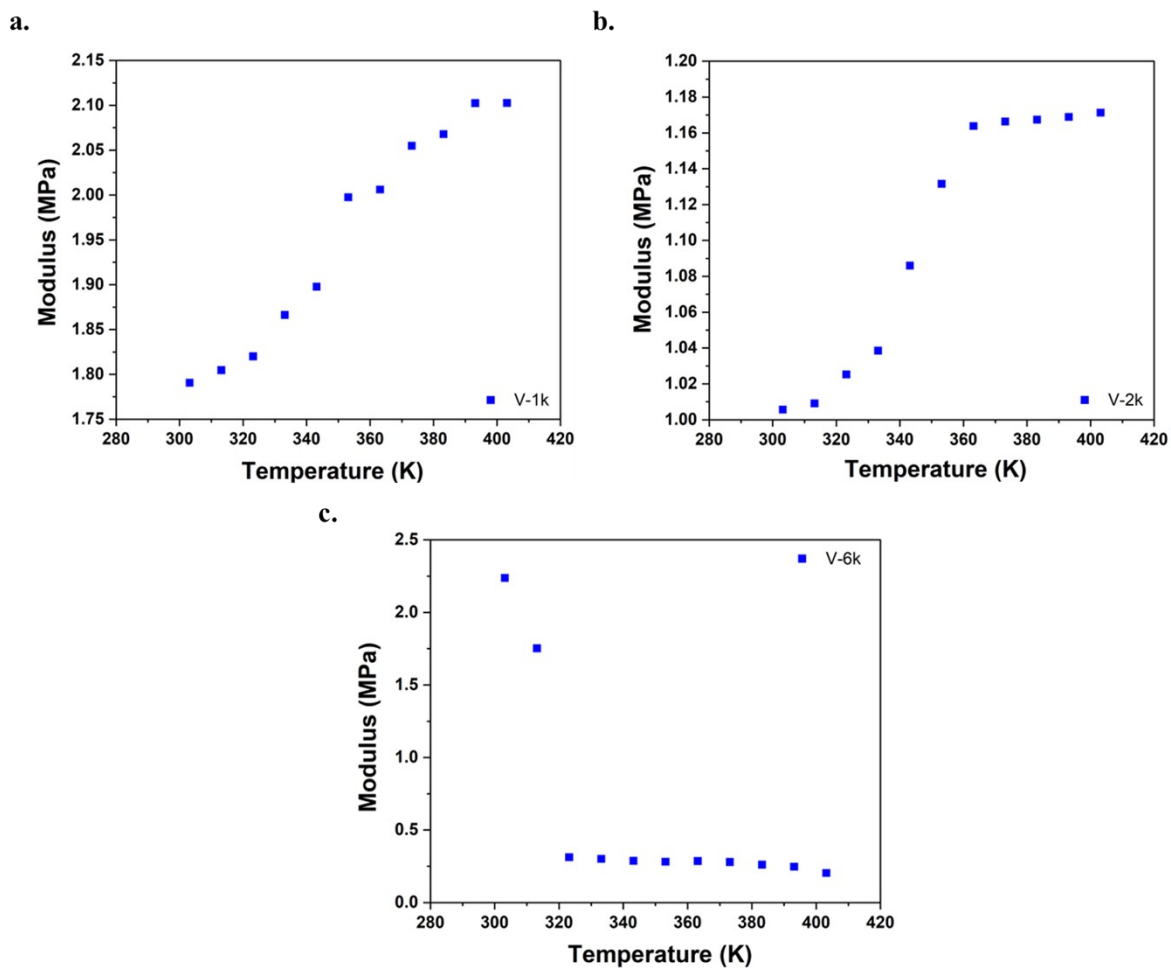

**Figure S7.** The shear modulus of the vitrimer networks increases linearly with increasing temperatures, indicating a conserved network topology. The plateau cannot be fully resolved in V-2k leading to non-linear deviations. V-6k crystallizes at lower temperatures leading to an increased modulus.

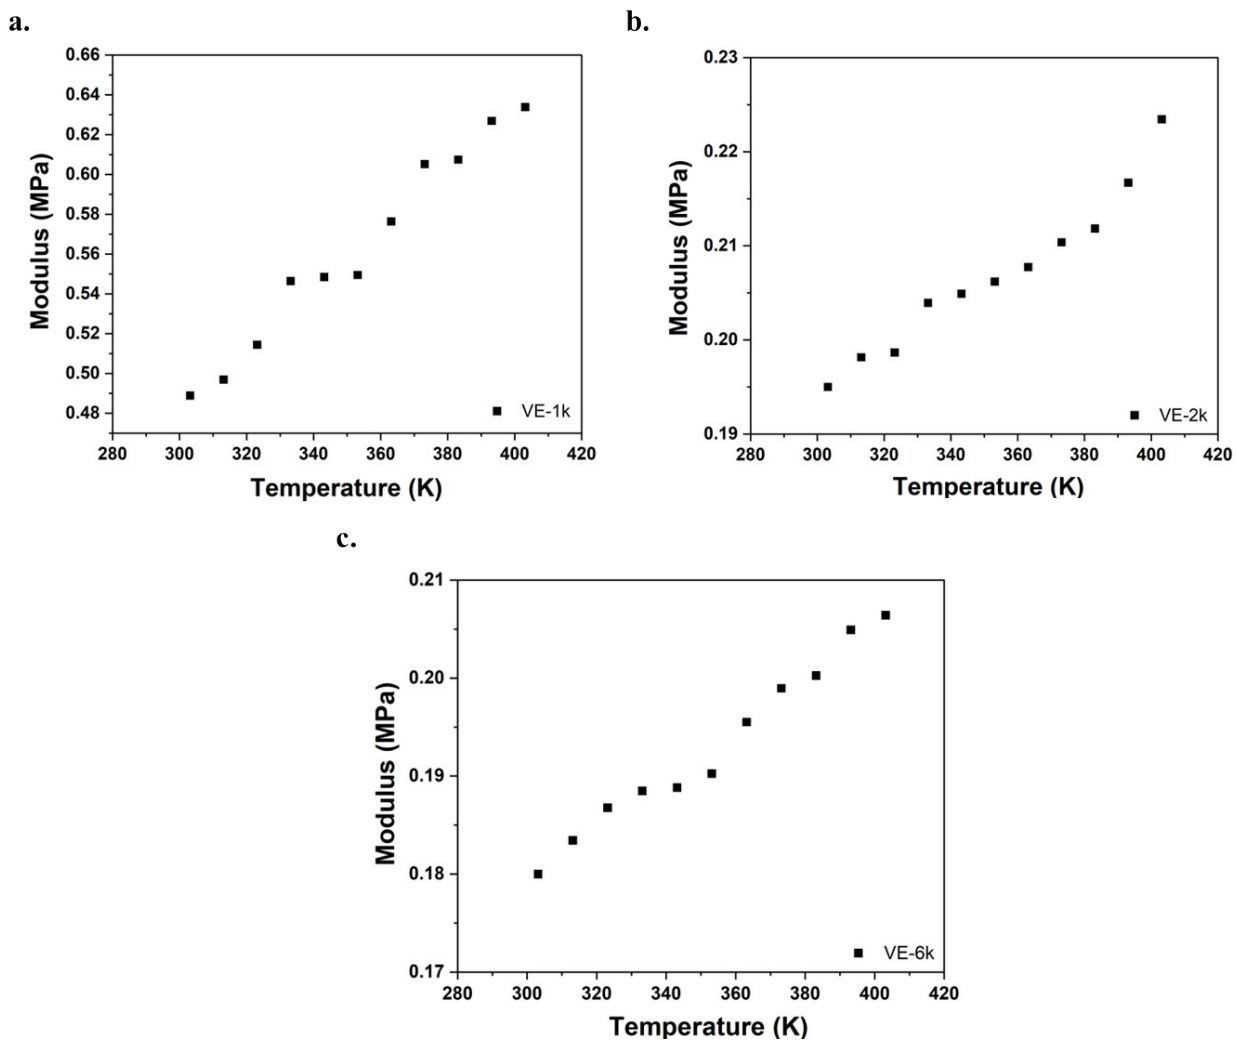

**Figure S8.** The shear modulus of the vitrimer electrolytes increases with increasing temperature, indicating a conserved network topology. Modulus also increases with crosslinking density.

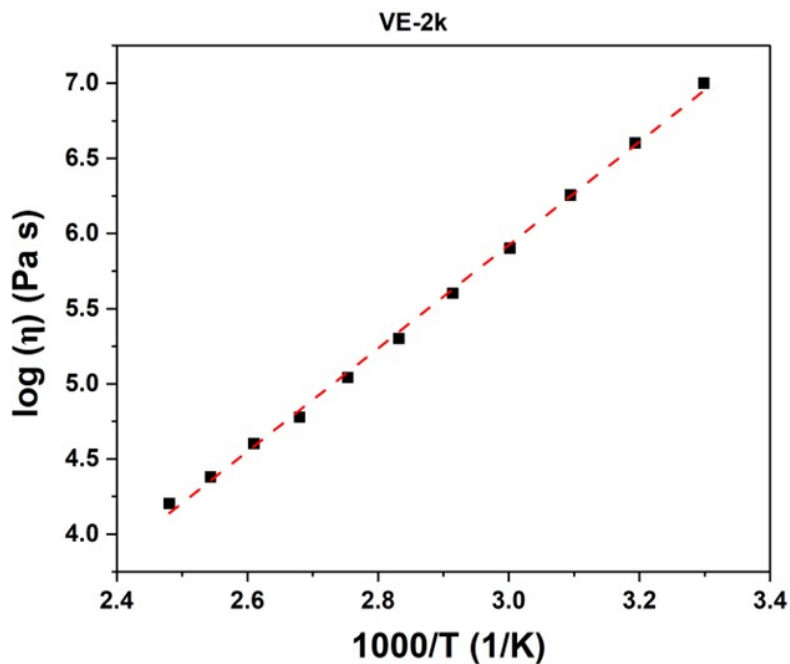

**Figure S9.** Viscosity values obtained from frequency sweep data show drop in magnitude with increasing temperature due to enhanced bond exchange. Calculated vitrimer temperature occurs at  $-64\text{ }^{\circ}\text{C}$  for VE-2k.

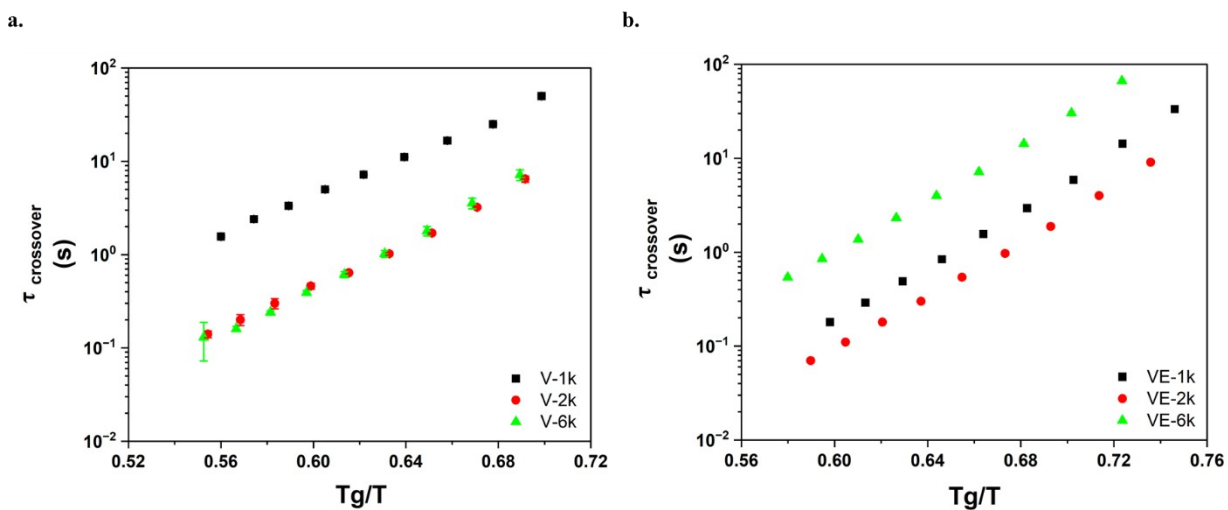

**Figure S10.** The crossover times do not collapse onto a single curve when plotted against normalized temperature  $T_g/T$  for networks **a.** without and **b.** with salt.

a.

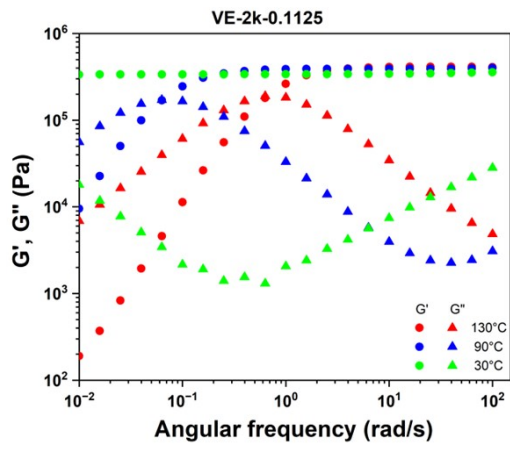

b.

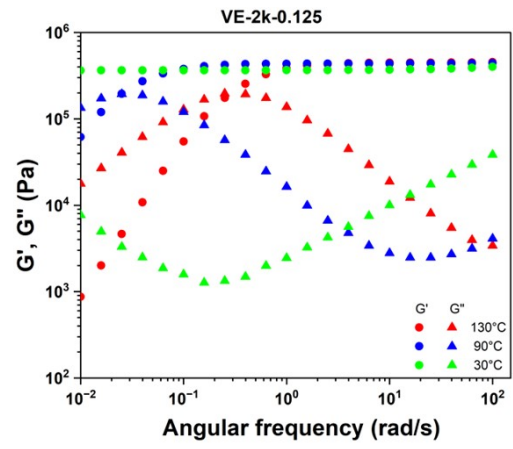

c.

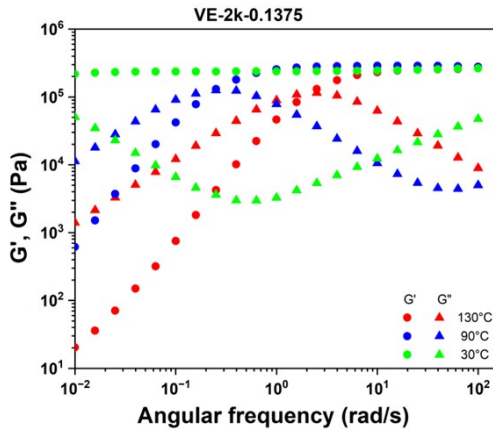

d.

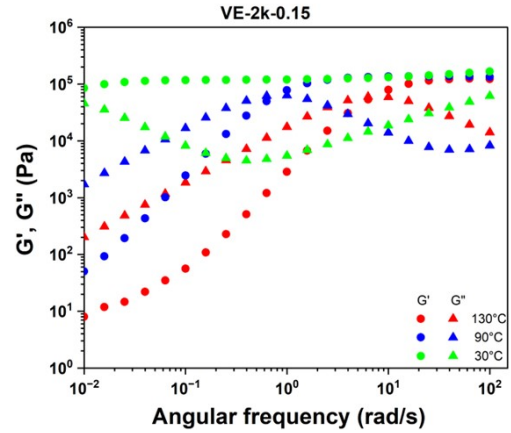

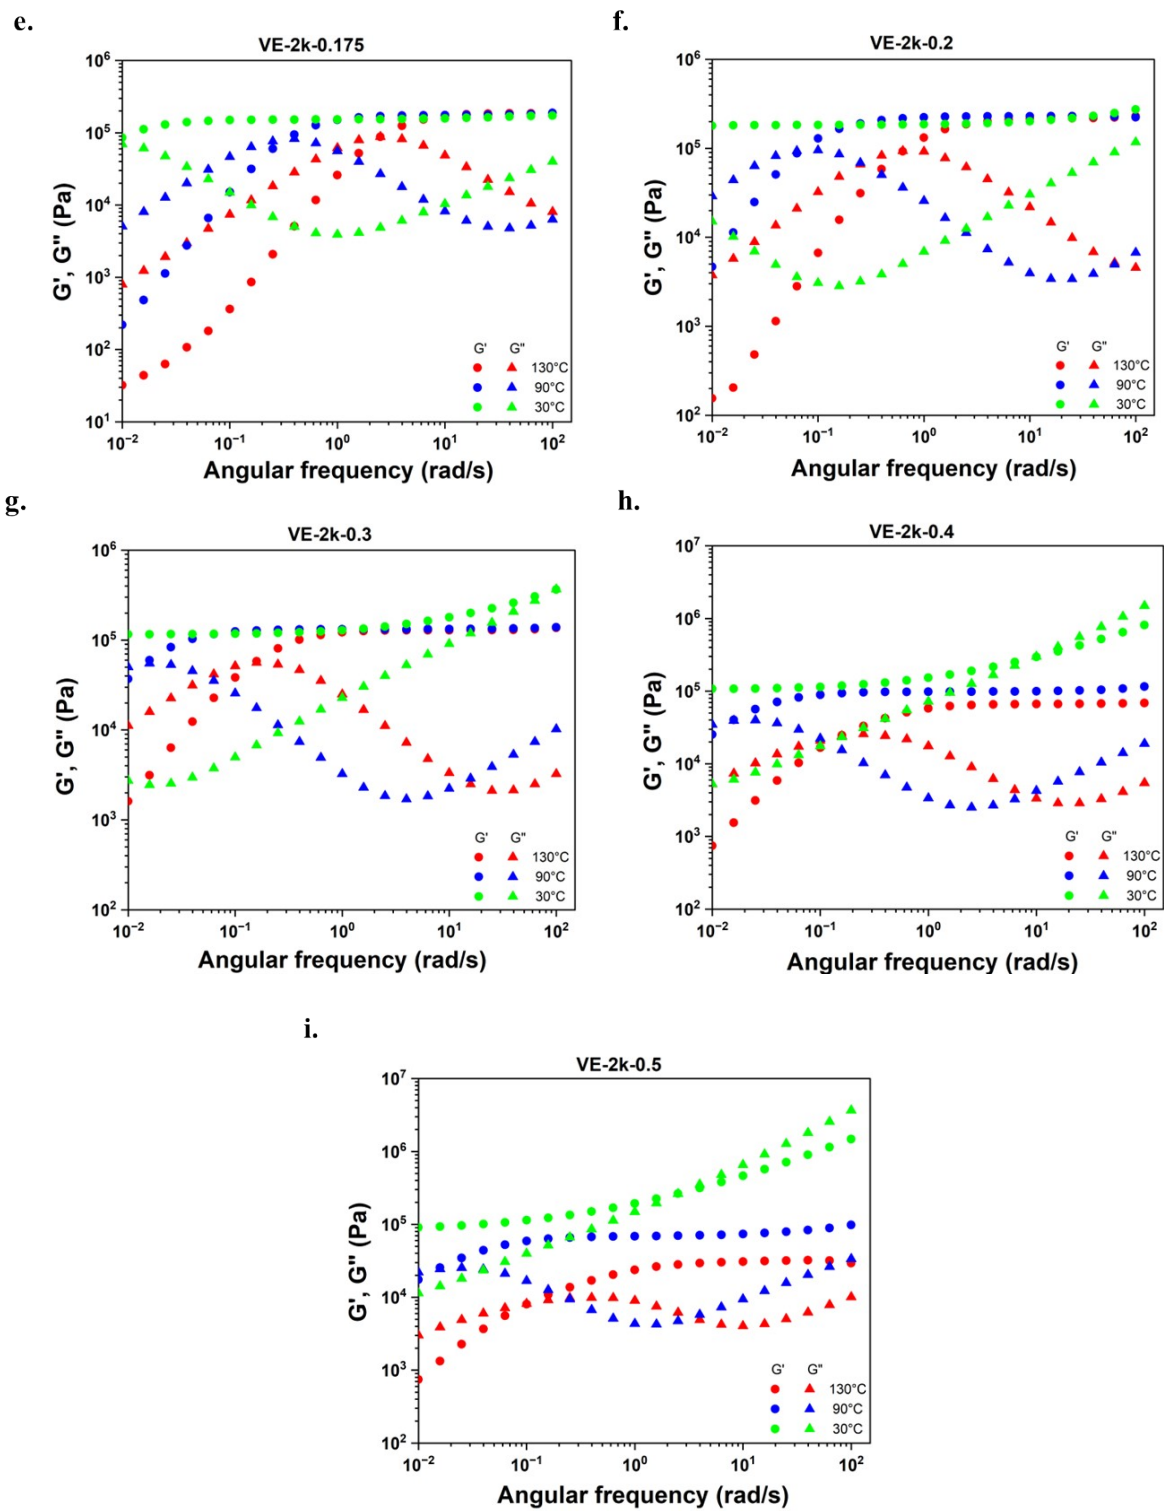

Figure S11. Frequency sweeps from 130°C to 30°C for VE-2k and  $r = 0.1 - 0.5$ .

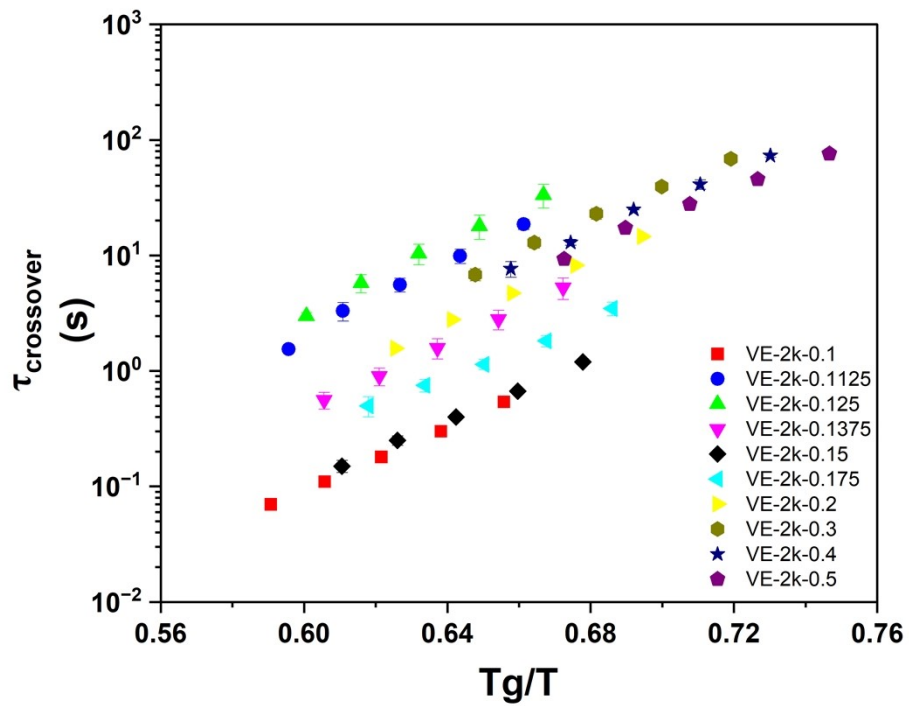

**Figure S12.** Crossover times do not overlap when plotted against normalized temperature for  $r < 0.2$  but begin to converge at higher salt concentrations.

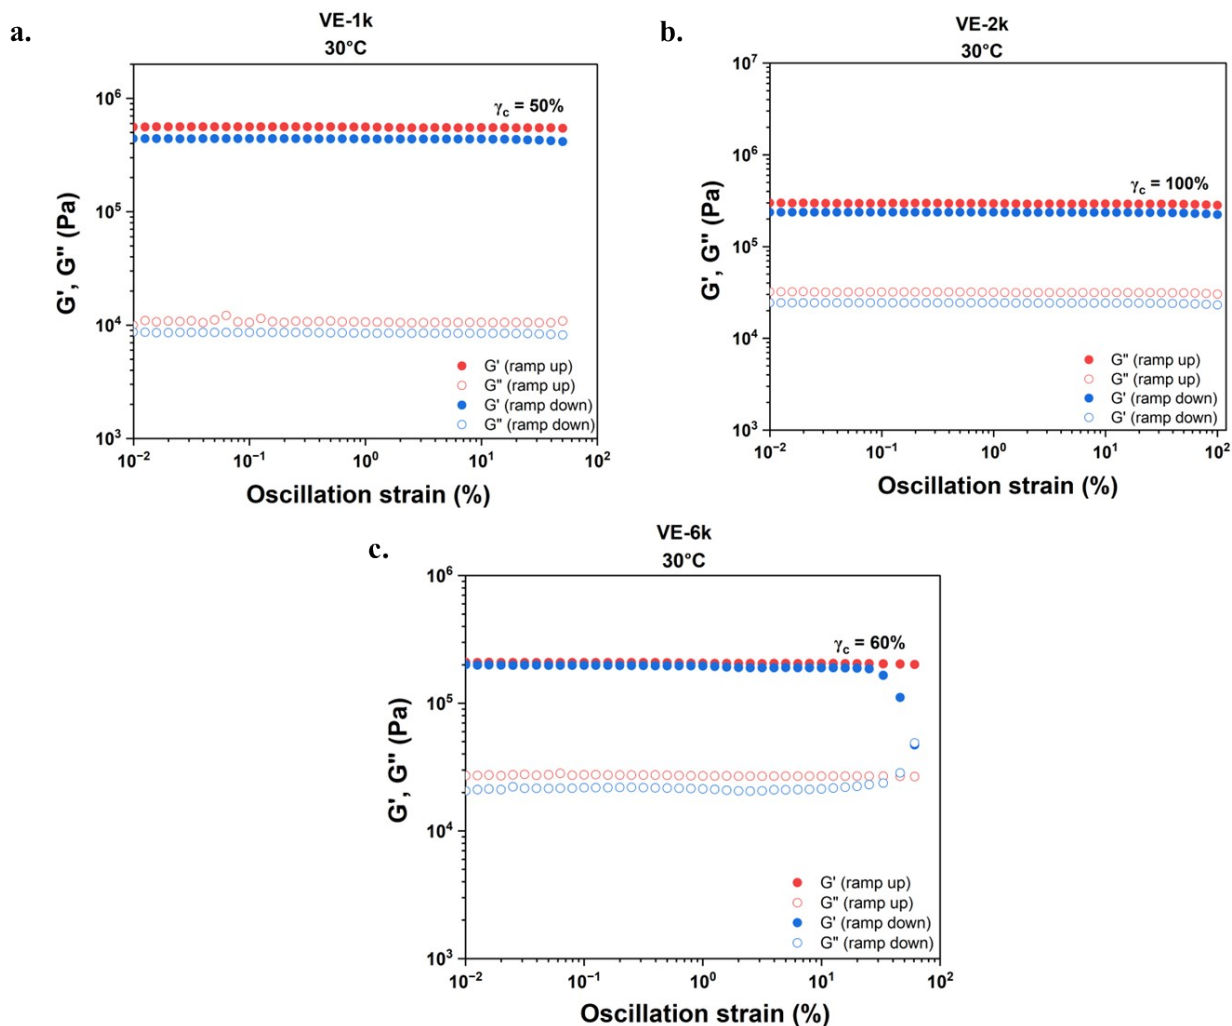

**Figure S13a.** Storage and loss modulus curves of VE-1k as a function of strain at 30 °C show good overlap during strain ramp up and ramp down cycles, indicating that the vitrimer electrolytes are not irreversibly disrupted by the LAOS measurements. **b.** VE-2k display highest critical strain ( $\gamma_c$ ) of 100% with strain invariant modulus. **c.** VE-6k also shows good strain recovery with 60% critical strain.

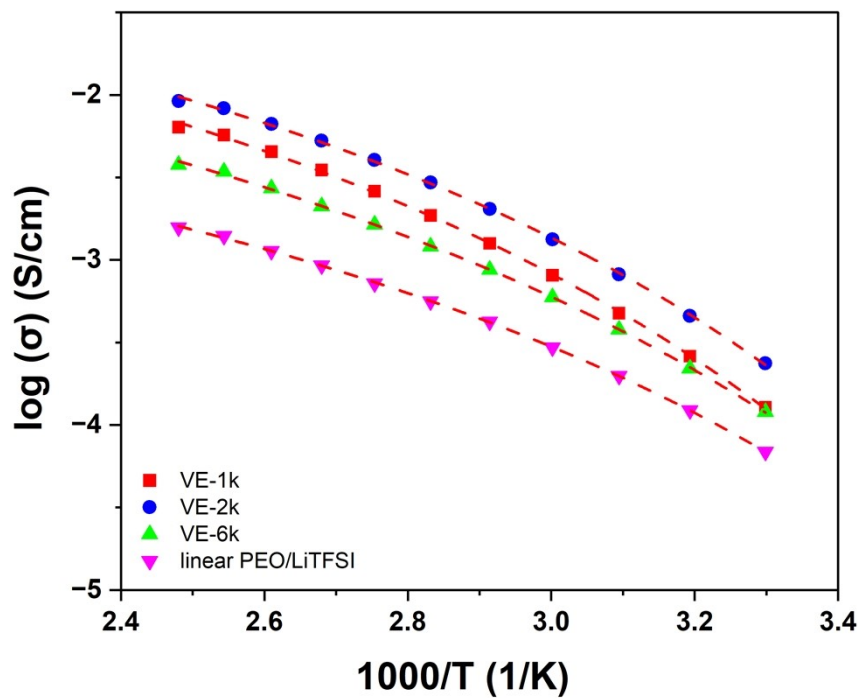

$$\text{VTF equation} - \sigma = \sigma_{\infty} \exp\left(-\frac{DT_0}{T - T_0}\right)$$

**Figure S14.** Ionic conductivity of imine vitrimer electrolytes fitted by the Vogel-Tammann-Fulcher (VTF) equation as a function of different linker lengths (VE-x), indicating some degree of coupling between ion transport and segmental dynamics.  $\sigma_{\infty}$  represents the limiting value of the conductivity at high temperature, D is the non-Arrhenius temperature dependence and  $T_0$  is the temperature at which the conductivity would converge to zero.

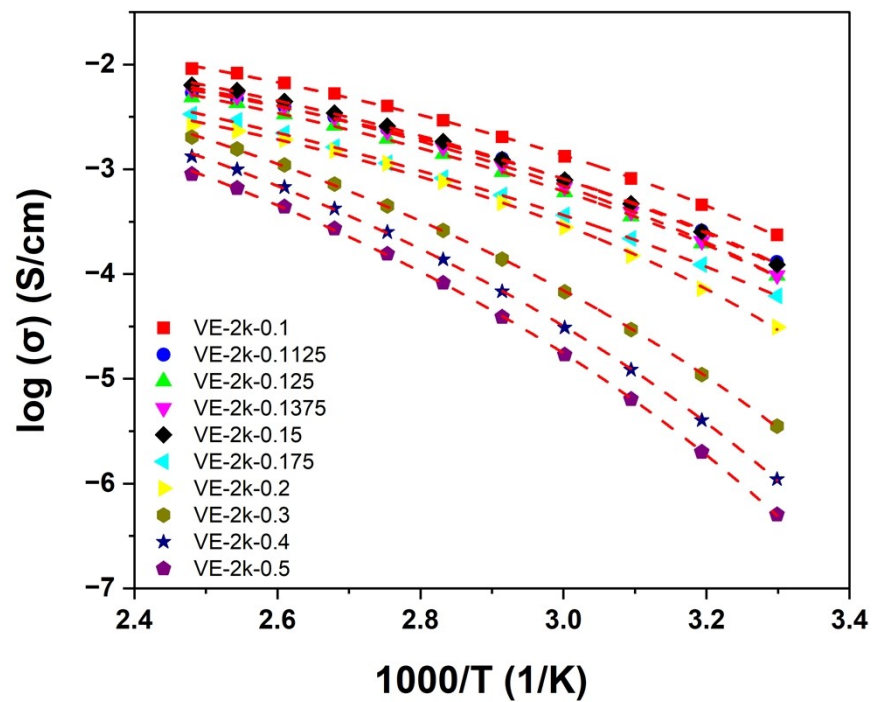

**Figure S15.** Ionic conductivity of imine vitrimer electrolytes fitted by the Vogel-Tammann-Fulcher (VTF) equation as a function of different salt concentrations (VE-2k-r).

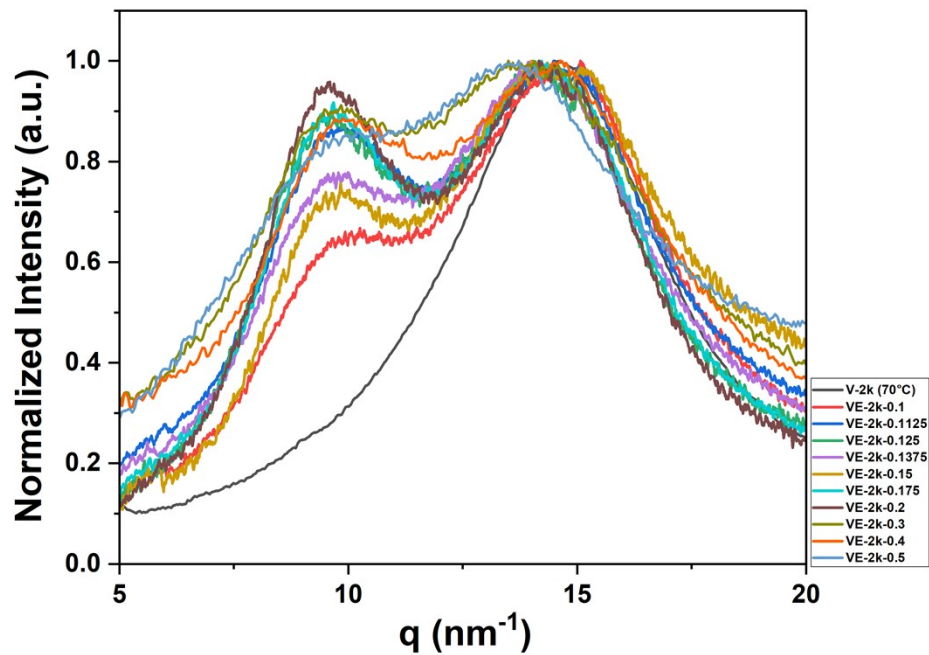

**Figure S16.** WAXS with an amorphous halo at  $q = 14.5 \text{ nm}^{-1}$  and ionic aggregate peak at  $q = 9.5 \text{ nm}^{-1}$ .

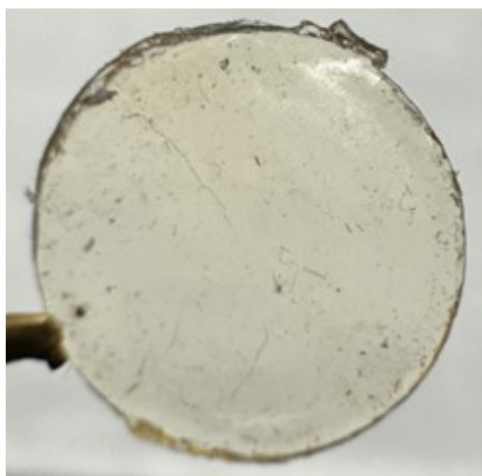

**Figure S17.** VE-2k-0.5 vitrimer electrolytes remains transparent despite high salt loading with no signs of salt-induced crystallization.

**Table S1.** VFT fit parameters for imine vitrimer electrolytes with varying crosslinking density (VE-x). No clear trends for D and  $T_0$  are observed.  $\sigma_\infty$  shows similar non-monotonic trends as that of  $\sigma$ .

| <b>Samples</b>    | <b>D</b> | <b><math>T_0</math> (K)</b> | <b><math>\sigma_\infty</math> (S/cm)</b> |
|-------------------|----------|-----------------------------|------------------------------------------|
| <b>VE-1k</b>      | 1.52     | 209                         | 0.27                                     |
| <b>VE-2k</b>      | 1.35     | 212                         | 0.3                                      |
| <b>VE-6k</b>      | 1.56     | 201                         | 0.14                                     |
| <b>PEO/LiTFSI</b> | 1.30     | 205                         | 0.035                                    |

**Table S2.** VFT fit parameters for imine vitrimer electrolytes with varying salt concentrations (VE-2k-r). No clear trends for D,  $T_0$  and  $\sigma_\infty$  are observed.

| <b>Samples</b>      | <b>D</b> | <b><math>T_0</math> (K)</b> | <b><math>\sigma_\infty</math> (S/cm)</b> |
|---------------------|----------|-----------------------------|------------------------------------------|
| <b>VE-2k-0.1</b>    | 1.35     | 212                         | 0.3                                      |
| <b>VE-2k-0.1125</b> | 1.12     | 221                         | 0.13                                     |
| <b>VE-2k-0.125</b>  | 1.56     | 208                         | 0.23                                     |
| <b>VE-2k-0.1375</b> | 1.41     | 214                         | 0.24                                     |
| <b>VE-2k-0.15</b>   | 1.48     | 210                         | 0.28                                     |
| <b>VE-2k-0.175</b>  | 2.67     | 180                         | 0.5                                      |
| <b>VE-2k-0.2</b>    | 1.15     | 228                         | 0.09                                     |
| <b>VE-2k-0.3</b>    | 2.6      | 206                         | 1.11                                     |
| <b>VE-2k-0.4</b>    | 2.7      | 209                         | 1.18                                     |
| <b>VE-2k-0.5</b>    | 2.86     | 209                         | 1.18                                     |
